# Supplementary material
Source: MDPI journal article supplement (https://www.mdpi.com/2073-8994/9/3/40)
Supplement: s1 [file s1]

**Supplemental Table S1.** Body weight and crown-rump length in male and female ferrets on postnatal days 4–90.

| Males   | <i>n</i> | Body weight (g) |          | Crown-rump length (cm) |       |
|---------|----------|-----------------|----------|------------------------|-------|
| PD 4    | 3        | 18.6            | ± 3.9    | 8.7                    | ± 0.4 |
| PD 10   | 3        | 42.5            | ± 3.9    | 11.8                   | ± 0.6 |
| PD 21   | 3        | 99.7            | ± 9.9    | 16.7                   | ± 1.3 |
| PD 42   | 3        | 259.3           | ± 25.3*  | 23.8                   | ± 0.3 |
| PD 90   | 3        | 1006.7          | ± 41.6** | 35.2                   | ± 6.3 |
| Females | <i>n</i> | Body weight (g) |          | Crown-rump length (cm) |       |
| PD 4    | 3        | 17.0            | ± 1.6    | 8.7                    | ± 0.1 |
| PD 10   | 3        | 40.4            | ± 5.8    | 9.9                    | ± 2.7 |
| PD 21   | 3        | 95.0            | ± 10.2   | 16.0                   | ± 0.9 |
| PD 42   | 3        | 216.3           | ± 7.5    | 22.6                   | ± 0.7 |
| PD 90   | 3        | 663.3           | ± 51.3   | 31.4                   | ± 5.0 |

Results are presented as mean ± SD.

PD: postnatal days

\*,  $p < 0.05$ , \*\*,  $p < 0.001$ , males vs females (Scheffe's test)

Two-way repeated measures Analysis of Variance (ANOVA) was carried out using postnatal age and sex as intergroup factors. Age-related sexual difference in the body weight was significant ( $p < 0.001$ ). Post hoc testing indicated that the body weight was significantly greater in males than in females on PDs 42 and 90, followed by significant simple main effects (PD 42,  $p < 0.05$ ; PD 90,  $p < 0.001$ ). On the other hand, age-related sexual difference was not revealed in the crown-rump length by ANOVA analysis.
