# Supplementary material
Source: MDPI journal article supplement (https://www.mdpi.com/2073-8994/9/3/40)
Supplement: s1 [file s1]

**Supplemental Table S2.** Volumes and asymmetry quotient of left and right hemispheres of the cerebral cortex in male and female ferrets on postnatal days 4 to 90.

|         | n = | Volume of left side (mm <sup>3</sup> ) |                      | Volume of right side (mm <sup>3</sup> ) |                      | AQ values |         |
|---------|-----|----------------------------------------|----------------------|-----------------------------------------|----------------------|-----------|---------|
| Males   |     |                                        |                      |                                         |                      |           |         |
| PD 4    | 3   | 89.4                                   | ± 4.5                | 90.0                                    | ± 4.5                | 0.007     | ± 0.006 |
| PD 10   | 3   | 222.3                                  | ± 3.3                | 223.0                                   | ± 0.8                | 0.003     | ± 0.015 |
| PD 21   | 3   | 668.5                                  | ± 87.8               | 644.4                                   | ± 90.0               | -0/038    | ± 0.017 |
| PD 42   | 3   | 1485.0                                 | ± 122.5              | 1456.0                                  | ± 106.2              | -0.019    | ± 0.011 |
| PD 90   | 3   | 1457.9                                 | ± 111.1 <sup>a</sup> | 1452.2                                  | ± 117.3 <sup>a</sup> | 0.004     | ± 0.011 |
| Females |     |                                        |                      |                                         |                      |           |         |
| PD 4    | 3   | 87.0                                   | ± 5.5                | 88.8                                    | ± 5.9                | 0.021     | ± 0.009 |
| PD 10   | 3   | 211.5                                  | ± 18.0               | 211.9                                   | ± 18.5               | 0.002     | ± 0.020 |
| PD 21   | 3   | 560.0                                  | ± 40.1               | 548.9                                   | ± 39.4               | -0.020    | ± 0.012 |
| PD 42   | 3   | 1301.3                                 | ± 17.6               | 1280.1                                  | ± 11.7               | -0.016    | ± 0.006 |
| PD 90   | 3   | 1212.8                                 | + 60.3               | 1213.6                                  | + 60.0               | 0.001     | + 0.004 |

Results of volumes of AQ values are presented as mean ± S.D.

AQ: asymmetry quotient; PD: postnatal days

\*:  $P < 0.05$ , Males vs Females, volumes of ipsilateral cerebral cortex (Scheffe's test)

Three-way repeated measures Analysis of Variance (ANOVA) was carried out using postnatal age and sex as intergroup factors, and left/right sides as an intergroup factor. Age-related sexual difference in the cerebral cortical volume was nearly significant ( $p < 0.056$ ). Post hoc testing indicated significantly greater volumes of both left ( $p < 0.05$ ) and right ( $p < 0.05$ ) sides of the cerebral cortex in males than in females on PD 90, followed by nearly significant simple main effects (left-side,  $p = 0.055$ ; right-side,  $p = 0.059$ ). On the other hand, sex-related left/right side differences were not revealed by ANOVA analysis.
