# Supplementary material
Source: MDPI journal article supplement (https://www.mdpi.com/2073-8994/9/3/40)
Supplement: s1 [file s1]

Archive with 8 entries (7 files):
- 10.symmetry-178806-supp-proof2/
- 10.symmetry-178806-supp-proof2/Supplemental_Figure_1.docx
- 10.symmetry-178806-supp-proof2/Supplemental_Figure_1.pdf
- 10.symmetry-178806-supp-proof2/Supplemental_Table_1.docx
- 10.symmetry-178806-supp-proof2/Supplemental_Table_1.pdf
- 10.symmetry-178806-supp-proof2/Supplemental_Table_2.docx
- 10.symmetry-178806-supp-proof2/Supplemental_Table_2.pdf
- 10.symmetry-178806-supp-proof2/~$pplemental_Figure_1.docx
