# Supplementary material
Source: MDPI journal article supplement (https://www.mdpi.com/2073-8994/9/3/40)
Supplement: s1 [file s1 › 10.symmetry-178806-supp-proof2/Supplemental_Table_1.docx]

**Supplemental Table S1.** Body weight and crown-rump length in male and female ferrets on postnatal days 4–90.

| Males | *n* | Body weight (g) | | | Crown-rump length (cm) | | |
| --- | --- | --- | --- | --- | --- | --- | --- |
| PD 4 | 3 | 18.6 | + | 3.9 | 8.7 | + | 0.4 |
| PD 10 | 3 | 42.5 | + | 3.9 | 11.8 | + | 0.6 |
| PD 21 | 3 | 99.7 | + | 9.9 | 16.7 | + | 1.3 |
| PD 42 | 3 | 259.3 | + | 25.3* | 23.8 | + | 0.3 |
| PD 90 | 3 | 1006.7 | + | 41.6** | 35.2 | + | 6.3 |
| Females | *n* | Body weight (g) | | | Crown-rump length (cm) | | |
|  |  |  |  |  |  |  |  |
| PD 4 | 3 | 17.0 | + | 1.6 | 8.7 | + | 0.1 |
| PD 10 | 3 | 40.4 | + | 5.8 | 9.9 | + | 2.7 |
| PD 21 | 3 | 95.0 | + | 10.2 | 16.0 | + | 0.9 |
| PD 42 | 3 | 216.3 | + | 7.5 | 22.6 | + | 0.7 |
| PD 90 | 3 | 663.3 | + | 51.3 | 31.4 | + | 5.0 |

Results are presented as mean ± SD.

PD: postnatal days

*: p < 0.05, **: p < 0.001, males vs females (Scheffe’s test)

Two-way repeated measures Analysis of Variance (ANOVA) was carried out using postnatal age and sex as intergroup factors. Age-related sexual difference in the body weight was significant (p < 0.001). Post hoc testing indicated that the body weight was significantly greater in males than in females on PDs 42 and 90, followed by significant simple main effects (PD 42, p < 0.05; PD 90, p < 0.001). On the other hand, age-related sexual difference was not revealed in the crown-rump length by ANOVA analysis.
