# Supplementary material
Source: MDPI journal article supplement (https://www.mdpi.com/2073-8994/9/3/40)
Supplement: s1 [file s1 › 10.symmetry-178806-supp-proof2/Supplemental_Table_2.docx]

**Supplemental Table S2.** Volumes and asymmetry quotient of left and right hemispheres of the cerebral cortex in male and female ferrets on postnatal days 4 to 90.

|  | n = | Volume of left side (mm3) | | | Volume of right side (mm3) | | | AQ values | | |
| --- | --- | --- | --- | --- | --- | --- | --- | --- | --- | --- |
| Males |  |  |  |  |  |  |  |  |  |  |
| PD 4 | 3 | 89.4 | + | 4.5 | 90.0 | + | 4.5 | 0.007 | + | 0.006 |
| PD 10 | 3 | 222.3 | + | 3.3 | 223.0 | + | 0.8 | 0.003 | + | 0.015 |
| PD 21 | 3 | 668.5 | + | 87.8 | 644.4 | + | 90.0 | -0/038 | + | 0.017 |
| PD 42 | 3 | 1485.0 | + | 122.5 | 1456.0 | + | 106.2 | -0.019 | + | 0.011 |
| PD 90 | 3 | 1457.9 | + | 111.1a | 1452.2 | + | 117.3a | 0.004 | + | 0.011 |
|  |  |  |  |  |  |  |  |  |  |  |
| Females |  |  |  |  |  |  |  |  |  |  |
| PD 4 | 3 | 87.0 | + | 5.5 | 88.8 | + | 5.9 | 0.021 | + | 0.009 |
| PD 10 | 3 | 211.5 | + | 18.0 | 211.9 | + | 18.5 | 0.002 | + | 0.020 |
| PD 21 | 3 | 560.0 | + | 40.1 | 548.9 | + | 39.4 | -0.020 | + | 0.012 |
| PD 42 | 3 | 1301.3 | + | 17.6 | 1280.1 | + | 11.7 | -0.016 | + | 0.006 |
| PD 90 | 3 | 1212.8 | + | 60.3 | 1213.6 | + | 60.0 | 0.001 | + | 0.004 |

Results of volumes of AQ values are presented as mean ± S.D.

AQ: asymmetry quotient; PD: postnatal days

*: *P* < 0.05, Males vs Females, volumes of ispilateral cerebral cortex (Scheffe’s test)

Three-way repeated measures Analysis of Variance (ANOVA) was carried out using postnatal age and sex as intergroup factors, and left/right sides as an intergroup factor. Age-related sexual difference in the cerebral cortical volume was nearly significant (*p* < 0.056). Post hoc testing indicated significantly greater volumes of both left (*p* < 0.05) and right (*p* < 0.05) sides of the cerebral cortex in males than in females on PD 90, followed by nearly significant simple main effects (left-side, *p* = 0.055; right-side, *p* = 0.059). On the other hand, sex-related left/right side differences were not revealed by ANOVA analysis.
